# Supplementary material for: From non-electroactive to electroactive species: highly selective and sensitive detection based on a dual-template molecularly imprinted polymer electrochemical sensor
Source: Royal Society of Chemistry journal article supplement (doi:10.1039/c7cc06329f), 2017-01-01
Supplement: c7cc06329f1.pdf [file c7cc06329f1.pdf]

**Electronic Supplementary Information**

**From non-electroactive to electroactive species: highly  
selective and sensitive detection based on dual-template  
molecularly imprinted electrochemical sensor**

Yunlong Dai, Xianwen Kan\*

College of Chemistry and Materials Science, Anhui Normal University, Wuhu  
241000, P.R. China; The Key Laboratory of Functional Molecular Solids, Ministry  
of Education; Anhui Laboratory of Molecule-Based Materials, Anhui Key  
Laboratory of Chemo-Biosensing.

## **Experimental**

### **1 Chemicals**

O-phenylenediamine (OPD) and thionine (TH) were purchased from Sigma-Aldrich Co., LLC. Bensulfuron-methyl (BSM, 98%), terbuthylazine (TB, 98.5%), pyrazosulfuron-ethyl (PSE, 98%), Imidacloprid (IMI, 99.9%), thiacloprid (THI, 98%), and Thiamethoxam (THIM, 99%) were ordered from Aladdin (Aladdin, China). Multi-walled carbon nanotubes (, diameters of 10–30 nm and lengths of 1–2  $\mu\text{m}$ ) were purchased from Shenzhen Nanotech Port Co. All other reagents were of at least analytical-reagent grade. And double-distilled deionized water was used for all solutions.

### **2 Apparatus**

Cyclic voltammetry (CV), differential pulse voltammetry (DPV), and Electrochemical impedance spectroscopy (EIS) were performed on CHI 660C workstation (ChenHua Instruments Co., Shanghai, China) with a conventional three-electrode system. A bare or modified glassy carbon electrode (GCE) was served as a working electrode. A saturated calomel electrode and a platinum wire electrode were used as a reference electrode and a counter-electrode, respectively. Field emission scanning electron microscope (FE-SEM) images were obtained on an S-4800 field emission scanning electron microscopy (Hitachi, Japan).

### **3 Preparation of DMIP/PTH/MWNTs/GCE**

The clean GCE was immersed into the carboxyl groups functionalized MWNTs suspension and treated with a constant potential of +1.7 V for 400 s, obtaining the

MWNTs/GCE. poly(thionine) (PTH) modified MWNTs/GCE (PTH/MWNTs/GCE) was prepared by electropolymerizing of 5.0 mmol/L TH in phosphate buffer solution (PBS, 0.1 mol /L, pH 6.0) for 30 cycles with the potential range from -0.4 V to 0.4 V at a scan rate of 50 mV/s. Then PTH/MWNTs/GCE was immersed in a pre-polymerization solution containing the o-phenylenediamine (OPD, 10 mmol/L), bensulfuron-methyl (BSM, 2 mmol/L), and imidacloprid (IMI, 3 mmol/L). The electropolymerization cycles and scan rate were -0.4 V - 0.8 V and 50 mV/s, respectively. Afterwards, the polymer modified electrode was incubated in hydrochloric acid solution (0.5 mol/L) for 15 min to extract the template molecules, which was labeled as DMIP/PTH/MWNTs/GCE. The procedure for the construction of the DMIP/PTH/MWNTs/GCE was illustrated in Scheme 1. As a comparison, non-molecular imprinted polymer (NIP) modified PTH/MWNTs/GCE (NIP/PTH/MWNTs/GCE) was prepared in the same process just in the absence of BSM and IMI.

#### **4 Electrochemical measurements**

All electrochemical measurements were performed in PBS (0.1 mol/L, pH 5.0). Chronoamperometry was performed at the potential of 1.7V and the equilibrium time was set at 400s. Selectivity of the sensor was investigated by choosing TB, BSE, THI, and THIM as interferents. Two paddy field water samples were randomly collected from different paddy fields on the outskirts of Wuhu on a same afternoon, which were used as real samples for the detection.

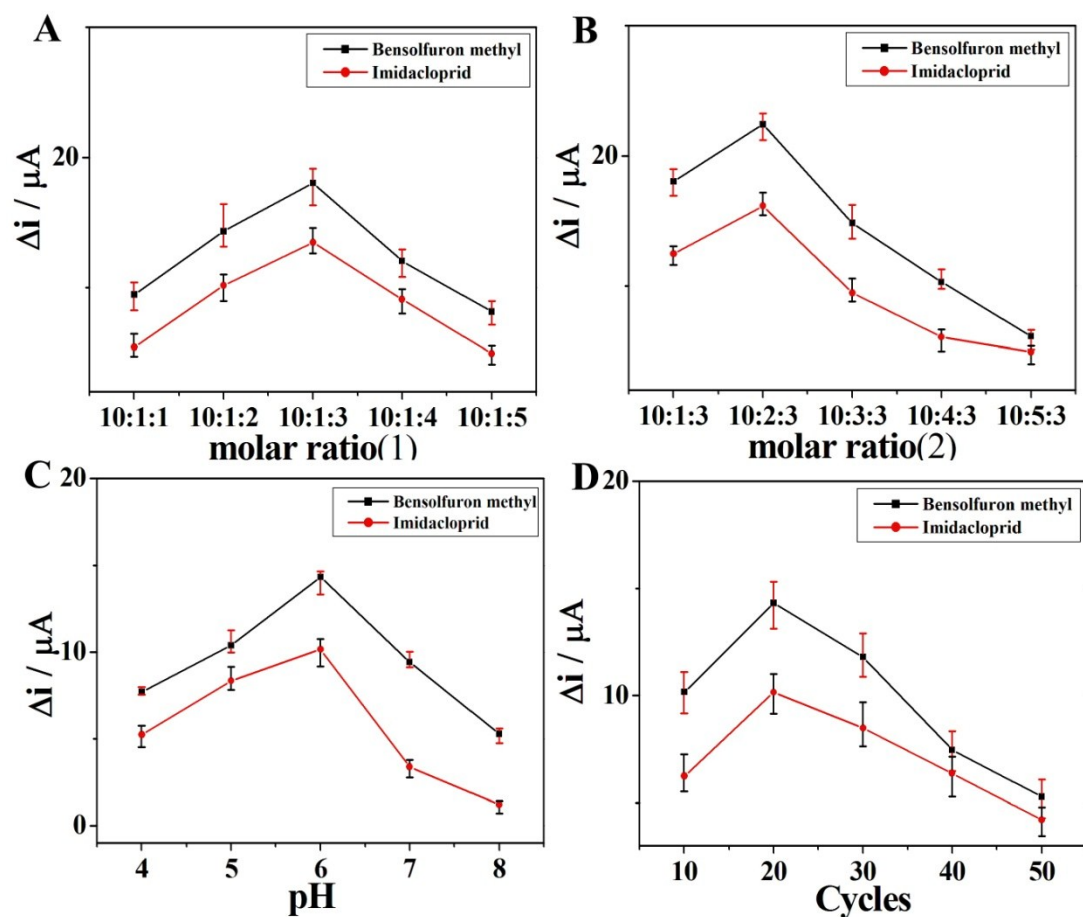

Fig. S1 The optimized condition for the preparation of imprinted sensor (BSM  $1 \times 10^{-5} \text{ mol L}^{-1}$ , IMI  $5.0 \times 10^{-5} \text{ mol L}^{-1}$ ). (A) The mole ratio between OPD and BSM, (B) the mole ratio between OPD and IMI, (C) the pH value of the pre-polymerization solution, and (D) the electropolymerization cycles for DMIP preparation.

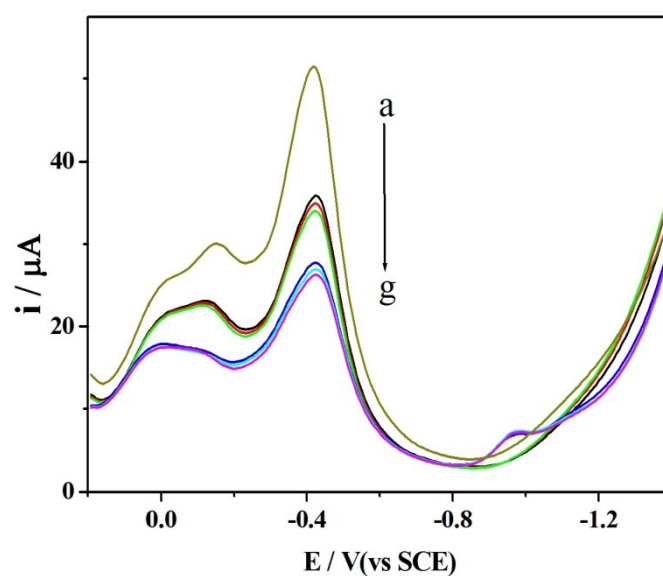

Fig. S2 DPV curves recorded on DMIP/PTH/MWNTs/GCE in (a) blank electrolyte, (b) BSM, (c) BSM and PSE, (d) BSM, PSE, and TB, (e) BSM, PSE, TB, and IMI, (f) BSM, PSE, TB, IMI, and TH, and (g) BSM, PSE, TB, IMI, TH, and THIM. (Concentrations of BSM, PSE, and TB were  $1.0 \times 10^{-5}$  mol/L. Concentrations of IMI, THI, and THIM were  $5.0 \times 10^{-5}$  mol/L.)

Table S1 Comparison of other electrochemical sensors for IMI detection with our work.

| Electrochemical sensor                                                                | linear range<br>(mol/L)                                                                    | LOD<br>(mol/L)        | Sensitivity<br>( $\mu\text{A}/\mu\text{mol/L}$ ) | Reference |
|---------------------------------------------------------------------------------------|--------------------------------------------------------------------------------------------|-----------------------|--------------------------------------------------|-----------|
| tricresyl phosphate-, silicone oil- and n-tetradecane-based carbon paste electrodes   | $6.6 \times 10^{-6}$ - $1.2 \times 10^{-4}$                                                | -                     | -                                                | 1         |
| nanosilver Nafion <sup>®</sup> /nanoTiO <sub>2</sub> Nafion <sup>®</sup> modified GCE | $3.0 \times 10^{-7}$ - $3.5 \times 10^{-6}$                                                | $2.5 \times 10^{-7}$  | -                                                | 2         |
| $\beta$ -CD polymer/rGO/GCE                                                           | $5.0 \times 10^{-8}$ - $1.5 \times 10^{-5}$<br>$2.0 \times 10^{-5}$ - $1.5 \times 10^{-4}$ | $2.0 \times 10^{-8}$  | -                                                | 3         |
| poly(carbazole)/rGO/GCE                                                               | $3.0 \times 10^{-6}$ - $1.0 \times 10^{-5}$                                                | $4.4 \times 10^{-7}$  | 0.0432                                           | 4         |
| MIP/rGO/GCE                                                                           | $7.5 \times 10^{-7}$ - $7.0 \times 10^{-5}$                                                | $4.0 \times 10^{-7}$  | 1.0419                                           | 5         |
| GO/GCE                                                                                | $8.0 \times 10^{-7}$ - $1.0 \times 10^{-5}$                                                | $3.6 \times 10^{-7}$  | 0.8898                                           | 6         |
| Nitrogen-doped Graphene/GCE                                                           | $4.0 \times 10^{-6}$ - $2.0 \times 10^{-5}$                                                | $5.5 \times 10^{-7}$  | -                                                | 7         |
| Pt-In nanocomposite/MIP/GCE                                                           | $2.0 \times 10^{-10}$ - $5.0 \times 10^{-8}$                                               | $1.2 \times 10^{-11}$ | 448                                              | 8         |
| GO/GCE                                                                                | $1.0 \times 10^{-5}$ - $2.0 \times 10^{-4}$                                                | $7.9 \times 10^{-6}$  | 0.38                                             | 9         |
| electrochemically pretreated boron-doped diamond electrode                            | $3.0 \times 10^{-5}$ - $2.0 \times 10^{-4}$                                                | $8.6 \times 10^{-6}$  | -                                                | 10        |
| MIP/PTH/MWCNTs/GCE                                                                    | $1.0 \times 10^{-7}$ - $1.0 \times 10^{-4}$                                                | $6.5 \times 10^{-8}$  | 0.1592                                           | This work |

## References

- 1 Z. Papp, I. Švancara, V. Guzsány, K. Vytrás and F. Gaál, *Microchim. Acta* 2009, **166**, 169.
- 2 A. Kumaravel and M. Chandrasekaran, *Sens. Actuators B*, 2011, **158**, 319.
- 3 M. Chen, Y. Meng, W. Zhang, J. Zhou, J. Xie and G. Diao, *Electrochim. Acta*, 2013, **108**, 1.
- 4 W. Lei, Q. Wu, W. Si, Z. Gu, Y. Zhang, J. Deng and Q. Hao, *Sens. Actuators B*, 2013, **183**, 102.
- 5 L. Kong, X. Jiang, Y. Zeng, T. Zhou and G. Shi, *Sens. Actuators B*, 2013, **185**, 424.
- 6 W. Lei, Z. Han, W. Si, Q. Hao, Y. Zhang, M. Xia and F. Wang, *ChemElectroChem*, 2014, **1**, 1063.

- 7 W. Si, W. Lei, Q. Hao, X. Xia, H. Zhang, J. Li, Q. Li and R. Cong, *Electrochim. Acta*, 2016, **212**, 784
- 8 S. Li, C. Liu, G. Yin, J. Luo, Z. Zhang and Y. Xie, *Microchim. Acta*, 2016, **183**, 3101.
- 9 V. Urbanová, A. Bakandritsos, P. Jakubec and T. Szambó, *Biosens. Bioelectron.*, 2017, **89**, 532-537.
- 10 M.B. Brahim, H.B. Ammar, R. Abdelhédi and Y. Samet, *Chin. Chem. Lett.*, 2016, **27**, 666.

Table S2 Application of DMIP/PTH/MWNTs/GCE to determine BSM and IMI in paddy field water.

| samples |     | Added<br>( $\times 10^{-6}$ mol/L) | Detected content by the<br>sensor <sup>a</sup> ( $\times 10^{-6}$ mol/L) | Recovery<br>(%) | RSD (%) |
|---------|-----|------------------------------------|--------------------------------------------------------------------------|-----------------|---------|
| 1       | BSM | 0.5                                | 0.47                                                                     | 94.60           | 3.8     |
|         | IMI | 1.0                                | 1.04                                                                     | 104.5           | 2.0     |
| 2       | BSM | 1.0                                | 1.02                                                                     | 102.9           | 2.3     |
|         | IMI | 10.0                               | 9.64                                                                     | 96.40           | 3.1     |

<sup>a</sup> Average value of three determination
